# Supplementary material for: Reactivity of five- and six-coordinated solvates. A complex formation and crystallographic study of the nickel(ii) bromide and iodide systems in dimethyl sulfoxide and N,N′-dimethylpropyleneurea
Source: Royal Society of Chemistry journal article supplement (doi:10.1039/b204128f), 2002-01-01

Fig. S1. Fitting of the absorbance of the UV-vis spectra of nickel(II) bromide *N,N'*-dimethylpropyleneurea using the molar absorption coefficients given in Table 1 at (a) 724, (b) 664, (c) 635 and (d) 449 nm.

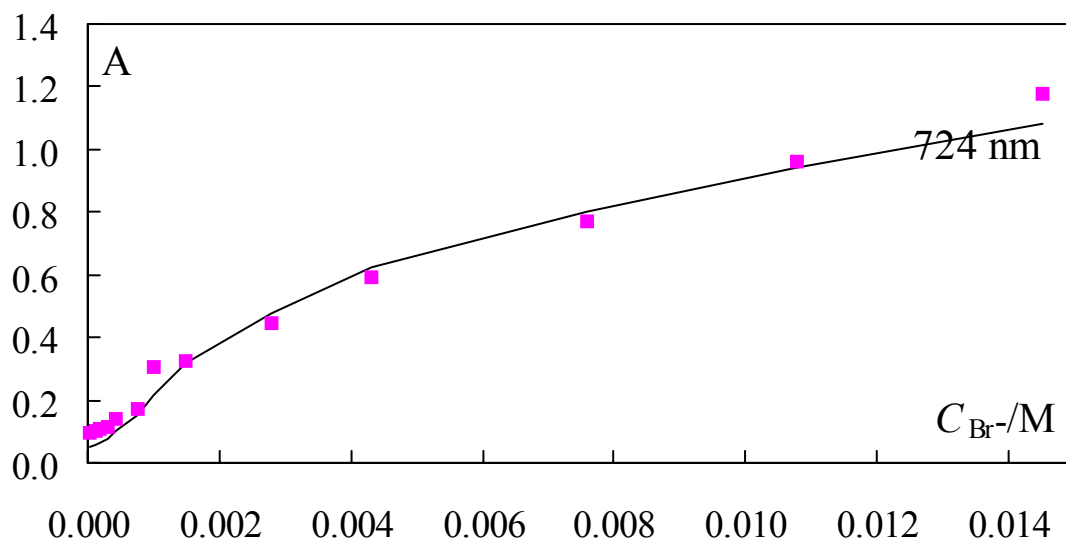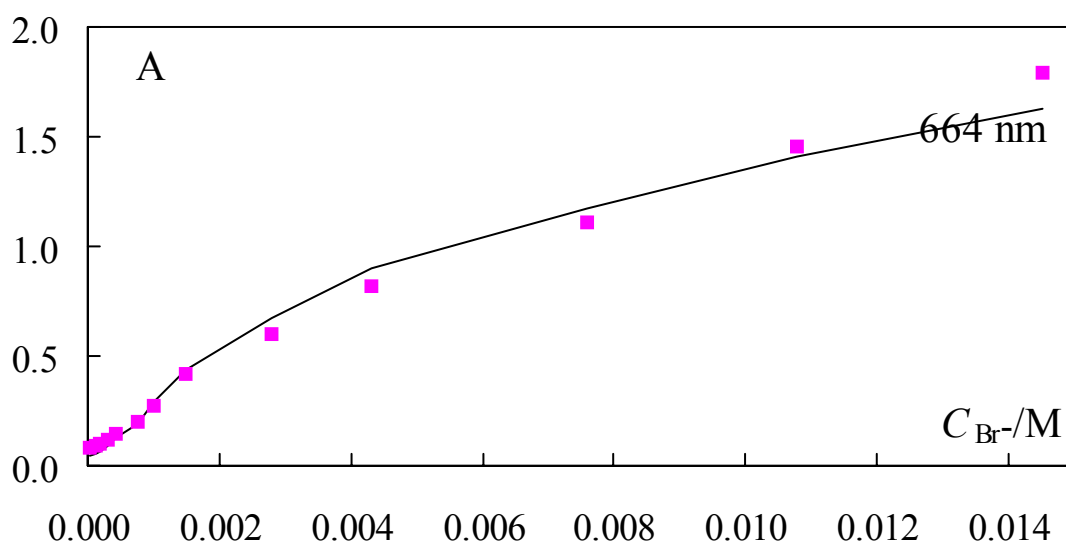

Fig. S1c.

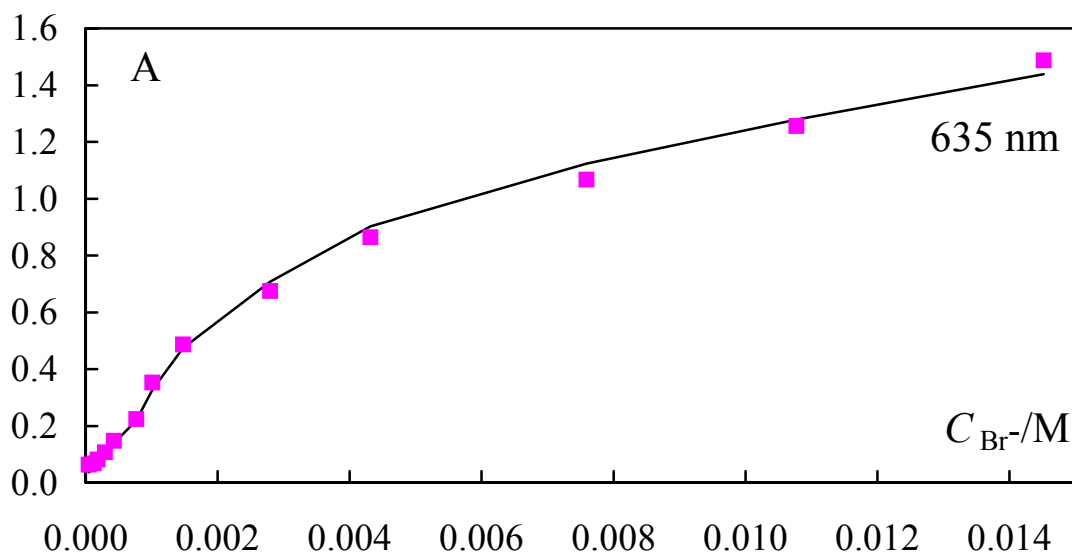

Fig. S1d.

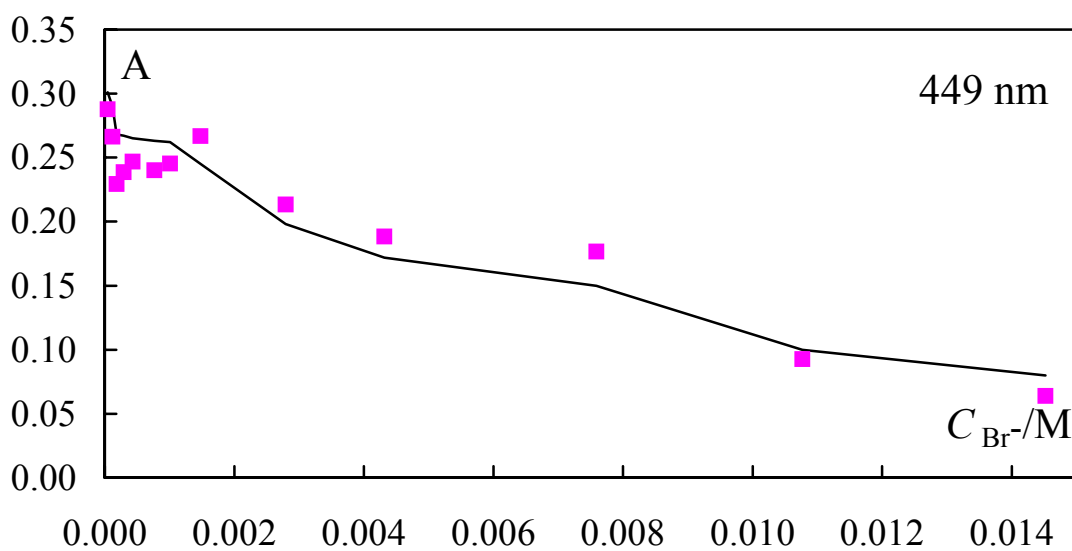

Supplement: b204128f-1.pdf [file b204128f-1.pdf]
