# Supplementary material for: Reactivity of five- and six-coordinated solvates. A complex formation and crystallographic study of the nickel(ii) bromide and iodide systems in dimethyl sulfoxide and N,N′-dimethylpropyleneurea
Source: Royal Society of Chemistry journal article supplement (doi:10.1039/b204128f), 2002-01-01
Supplement: b204128f-3.pdf [file b204128f-3.pdf]

Fig. S3. Complex formation function for the nickel(II)-bromide system in *N,N'*-dimethylpropyleneurea.

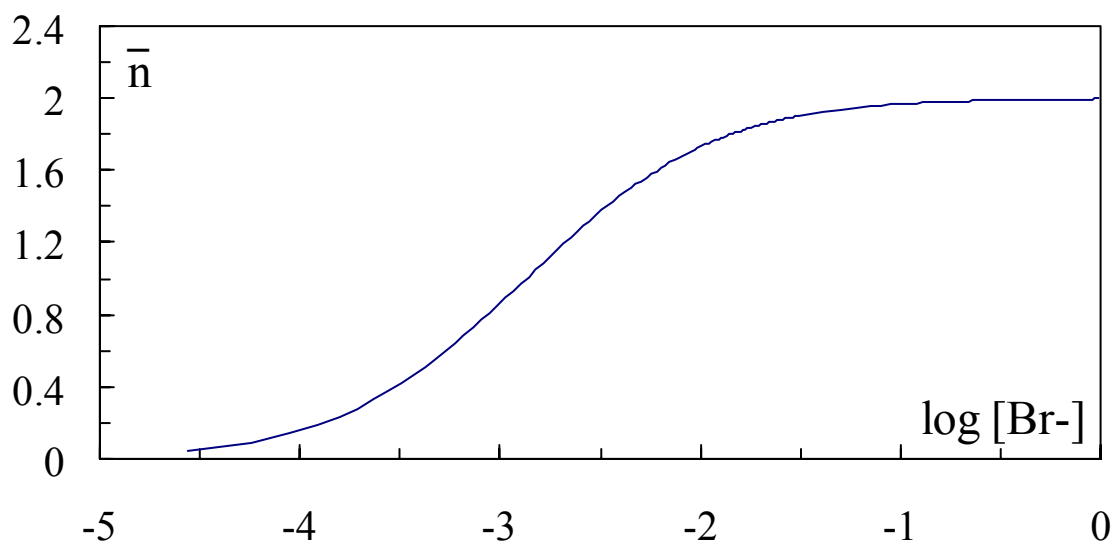

Fig. S3.
