# Supplementary figures and images for: Reactivity of five- and six-coordinated solvates. A complex formation and crystallographic study of the nickel(ii) bromide and iodide systems in dimethyl sulfoxide and N,N′-dimethylpropyleneurea
Source: Royal Society of Chemistry journal article supplement (doi:10.1039/b204128f), 2002-01-01

Fig. S4b.

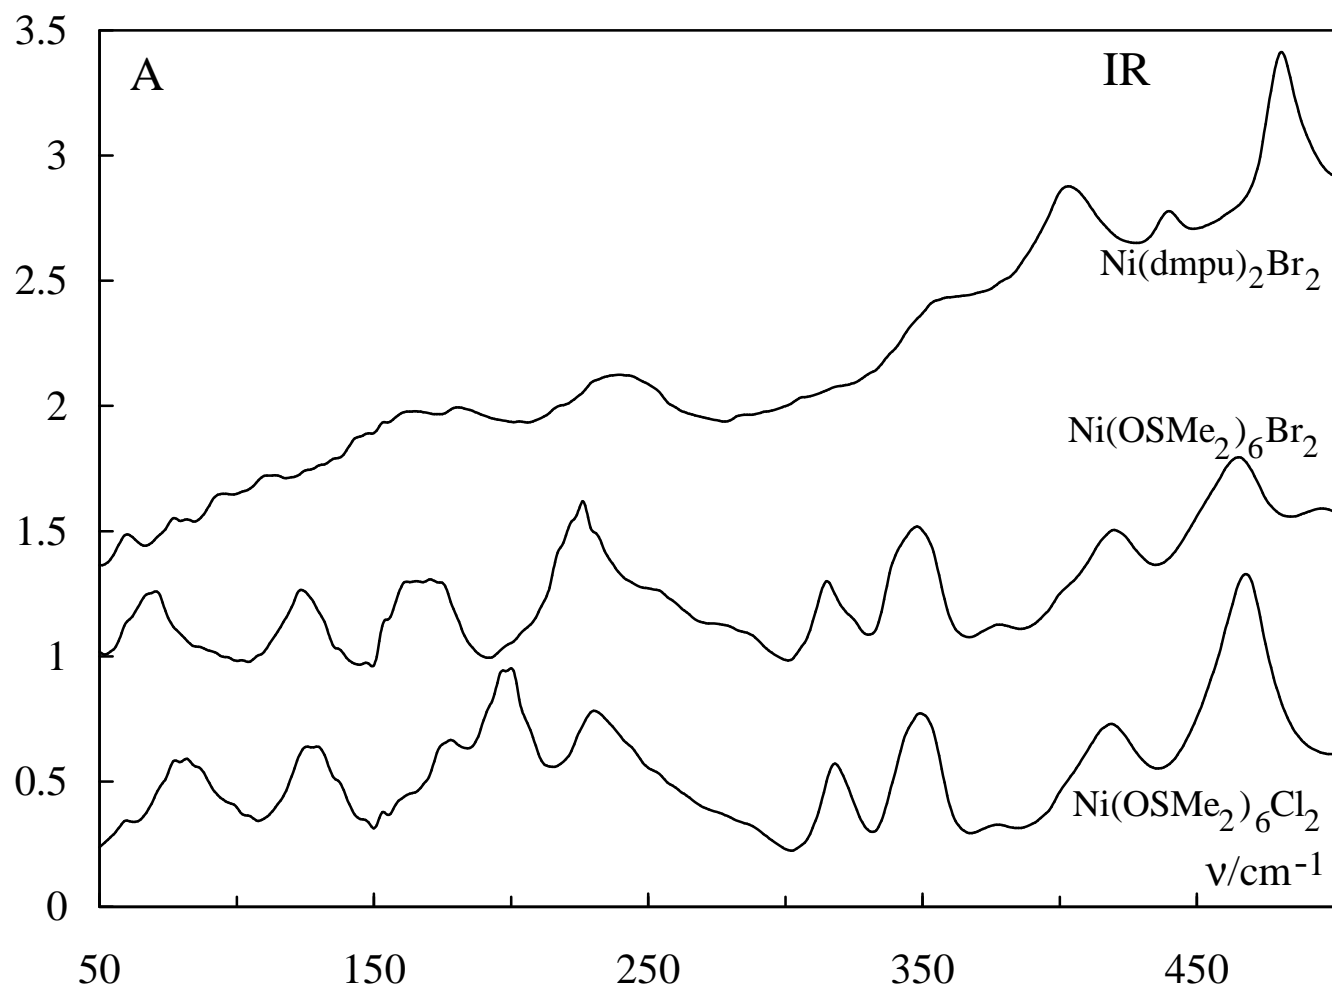

Supplement: b204128f-4b.pdf [file b204128f-4b.pdf]

Fig. S4c.

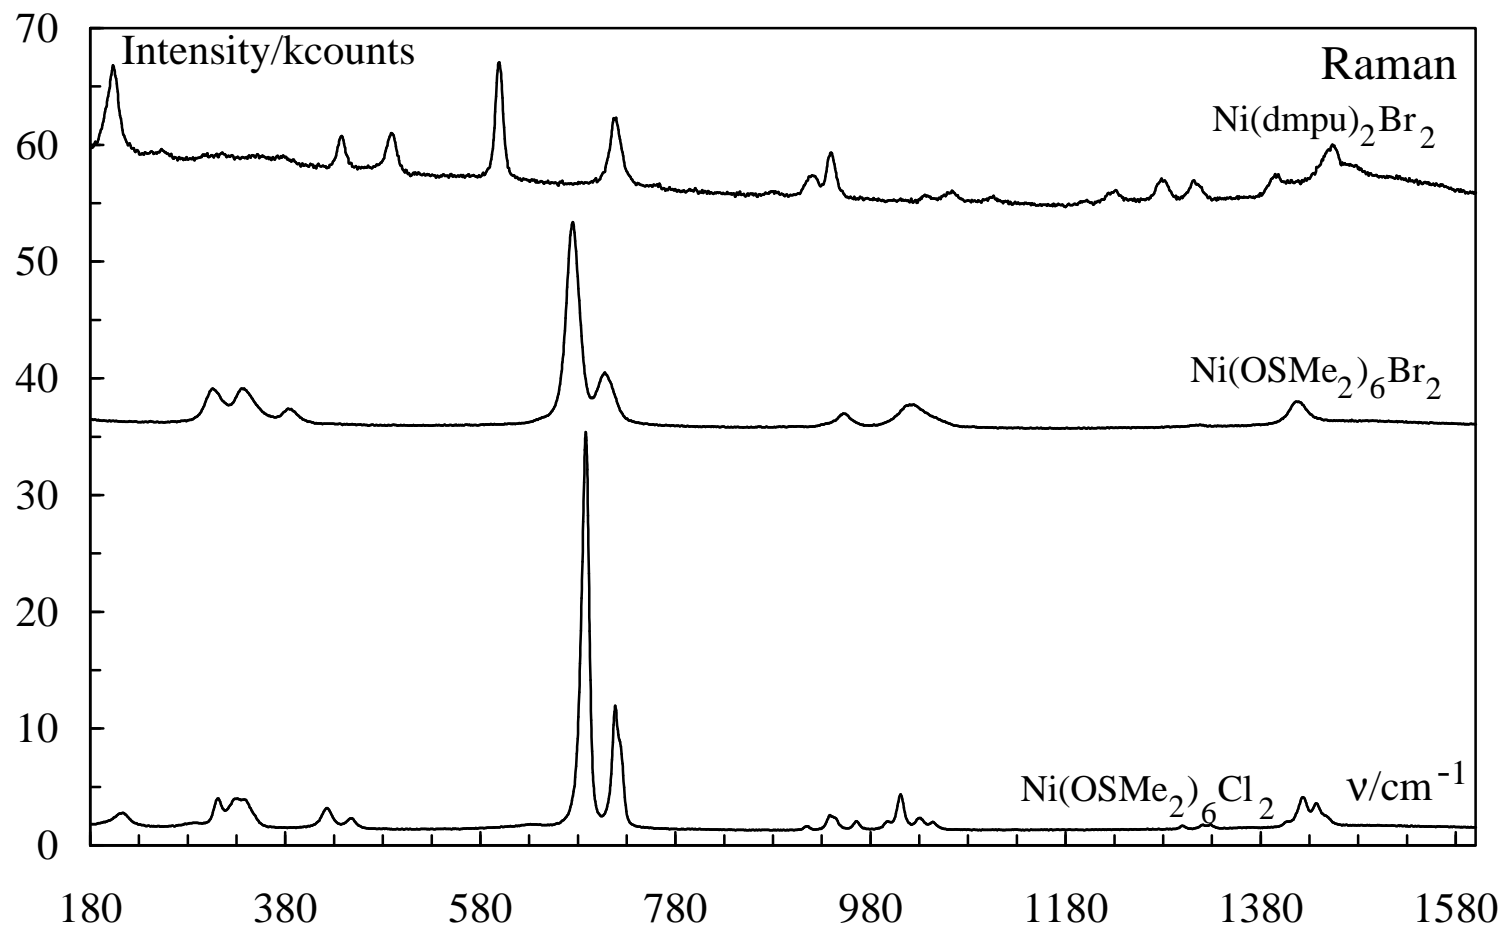

Supplement: b204128f-4c.pdf [file b204128f-4c.pdf]
